# Supplementary material for: Smartphone Apps for Measuring Human Health and Climate Change Co-Benefits: A Comparison and Quality Rating of Available Apps
Source: PubMed Central journal article supplement (PMC5206483; doi:10.2196/mhealth.5931), 2016-12-19
Supplement: mhealth_v4i4e135_app2.pdf [file mhealth_v4i4e135_app2.pdf]

Table 1 - MARS Quality Scores for Transport Apps

| App Title                      | iOS or Android | Engagement |         | Functionality |         | Aesthetics |         | Information |         | Subjective score |         | App Specific Score |         | Overall Mean Score |         |
|--------------------------------|----------------|------------|---------|---------------|---------|------------|---------|-------------|---------|------------------|---------|--------------------|---------|--------------------|---------|
|                                |                | Rater 1    | Rater 2 | Rater 1       | Rater 2 | Rater 1    | Rater 2 | Rater 1     | Rater 2 | Rater 1          | Rater 2 | Rater 1            | Rater 2 | Rater 1            | Rater 2 |
| <b>Bikes vs Cars</b>           | iOS            | 3.00       | 2.20    | 5.00          | 4.80    | 3.67       | 4.70    | 3.00        | 2.40    | 3.00             | 2.80    | 2.40               | 2.00    | 3.67               | 3.50    |
| <b>Bike Companion</b>          | Android        | 2.00       | -       | 2.25          | -       | 2.33       | -       | 2.20        | -       | 2.50             | -       | 1.20               | -       | 2.20               | -       |
| <b>Bike da firma</b>           | iOS            | 3.40       | -       | 3.75          | -       | 4.00       | -       | 3.00        | -       | 3.75             | -       | 2.60               | -       | 3.54               | -       |
| <b>Changers</b>                | iOS            | 3.80       | 3.60    | 4.00          | 4.50    | 4.33       | 4.30    | 3.80        | 3.40    | 3.75             | 3.50    | 3.60               | 3.20    | 3.98               | 3.90    |
| <b>Commute Greener</b>         | iOS            | 2.00       | -       | 2.75          | -       | 2.33       | -       | 3.00        | -       | 1.75             | -       | 2.80               | -       | 2.52               | -       |
| <b>Cycling 365</b>             | iOS            | 2.00       | 2.00    | 3.25          | 3.30    | 3.00       | 2.00    | 3.17        | 3.20    | 2.25             | 3.50    | 1.60               | 1.20    | 2.86               | 2.60    |
| <b>Ecolife</b>                 | iOS            | 3.00       | 2.60    | 4.50          | 4.30    | 4.00       | 4.30    | 3.00        | 3.50    | 4.00             | 4.00    | 3.60               | 3.40    | 3.63               | 3.70    |
| <b>Eco Via</b>                 | Android        | 2.60       | 2.60    | 4.00          | 4.30    | 3.67       | 3.70    | 3.17        | 3.50    | 2.75             | 3.50    | 2.80               | 2.00    | 3.36               | 3.50    |
| <b>E-Mission</b>               | iOS            | 2.00       | -       | 3.00          | -       | 2.67       | -       | 2.60        | -       | 1.75             | -       | 1.40               | -       | 2.57               | -       |
| <b>Electrip</b>                | iOS            | 2.60       | 2.20    | 4.75          | 4.50    | 4.00       | 4.00    | 2.80        | 2.60    | 2.25             | 2.30    | 2.20               | 1.40    | 3.54               | 3.30    |
| <b>Fuel Good</b>               | iOS            | 3.00       | 2.40    | 4.75          | 4.80    | 3.33       | 3.30    | 3.83        | 3.30    | 3.50             | 3.50    | 3.60               | 3.40    | 3.73               | 3.50    |
| <b>Greener Mile</b>            | iOS            | 3.00       | 3.20    | 4.50          | 4.50    | 3.00       | 3.30    | 3.50        | 4.00    | 3.75             | 4.00    | 3.20               | 2.80    | 3.50               | 3.80    |
| <b>Green Steps</b>             | Android        | 2.00       | 1.80    | 4.25          | 4.30    | 3.33       | 3.00    | 2.60        | 2.50    | 1.75             | 1.50    | 1.60               | 1.00    | 3.05               | 2.90    |
| <b>Green Travel Choice</b>     | iOS            | 2.20       | 2.20    | 4.25          | 4.30    | 2.67       | 2.30    | 3.20        | 2.60    | 2.50             | 2.80    | 2.80               | 2.60    | 3.08               | 2.90    |
| <b>modalyzer</b>               | iOS            | 2.80       | -       | 4.00          | -       | 3.33       | -       | 3.00        | -       | 2.25             | -       | 2.40               | -       | 3.28               | -       |
| <b>My Carbon</b>               | Android        | 2.40       | -       | 3.75          | -       | 3.33       | -       | 3.00        | -       | 2.00             | -       | 2.00               | -       | 3.12               | -       |
| <b>My Open Road</b>            | Android        | 3.80       | 3.40    | 3.50          | 3.30    | 3.67       | 3.30    | 3.20        | 3.50    | 3.25             | 3.80    | 3.20               | 2.60    | 3.54               | 3.40    |
| <b>My Open Road</b>            | iOS            | 3.60       | 3.40    | 3.75          | 3.80    | 4.00       | 2.70    | 3.17        | 3.40    | 3.75             | 4.00    | 3.20               | 2.80    | 3.63               | 3.20    |
| <b>Singapore G1 Live Green</b> | Android        | 2.20       | -       | 3.50          | -       | 3.00       | -       | 2.40        | -       | 1.75             | -       | 2.00               | -       | 2.78               | -       |
| <b>TripGo</b>                  | iOS            | 3.20       | 3.40    | 4.25          | 3.80    | 3.33       | 3.70    | 3.25        | 3.30    | 3.50             | 4.30    | 2.20               | 2.20    | 3.51               | 3.60    |
| <b>Vapourz</b>                 | iOS            | 2.40       | 2.20    | 4.75          | 5.00    | 3.33       | 3.30    | 3.20        | 2.80    | 2.50             | 2.30    | 1.80               | 1.40    | 3.42               | 3.30    |

\*Shaded green = good quality, no shading = acceptable quality, shaded grey = poor quality

Table 2 - MARS Quality Scores for Diet Apps

| App Title | iOS or Android | Engagement | Functionality | Aesthetics | Information | Subjective | App Specific | Overall Mean |
|-----------|----------------|------------|---------------|------------|-------------|------------|--------------|--------------|
|-----------|----------------|------------|---------------|------------|-------------|------------|--------------|--------------|

|                                           | Android |         |         |         |         |         |         |         |         | score   |         | Score   |         | Score   |         |
|-------------------------------------------|---------|---------|---------|---------|---------|---------|---------|---------|---------|---------|---------|---------|---------|---------|---------|
|                                           |         | Rater 1 | Rater 2 | Rater 1 | Rater 2 | Rater 1 | Rater 2 | Rater 1 | Rater 2 | Rater 1 | Rater 2 | Rater 1 | Rater 2 | Rater 1 | Rater 2 |
| <b>AGE Carbon Calculator</b>              | Android | 1.60    | -       | 3.50    | -       | 2.67    | -       | 2.67    | -       | 1.75    | -       | 1.40    | -       | 2.61    | -       |
| <b>Carbon Buster</b>                      | iOS     | 2.00    | 2.00    | 4.50    | 4.30    | 3.00    | 3.30    | 2.80    | 2.60    | 2.50    | 2.50    | 2.60    | 3.00    | 3.07    | 3.10    |
| <b>Carbon Footprinter</b>                 | iOS     | 1.80    | 1.60    | 4.00    | 4.80    | 2.33    | 2.00    | 3.00    | 2.70    | 2.00    | 2.00    | 2.00    | 1.60    | 2.78    | 2.80    |
| <b>CarbonSins</b>                         | Android | 1.18    | -       | 2.75    | -       | 2.00    | -       | 2.00    | -       | 1.50    | -       | 1.00    | -       | 1.98    | -       |
| <b>Count Carbon</b>                       | Android | 1.60    | 1.40    | 5.00    | 5.00    | 1.67    | 2.00    | 1.80    | 1.80    | 1.50    | 1.50    | 1.00    | 1.00    | 2.52    | 2.60    |
| <b>CO<sub>2</sub> Emission Calculator</b> | Android | 1.40    | -       | 5.00    | -       | 1.30    | -       | 2.50    | -       | 1.50    | -       | 1.20    | -       | 2.55    | -       |
| <b>CO<sub>2</sub> Footprint</b>           | iOS     | 2.20    | 2.20    | 5.00    | 5.00    | 3.00    | 3.70    | 2.20    | 3.20    | 1.50    | 2.50    | 1.40    | 2.00    | 3.10    | 3.50    |
| <b>EcoChallenge</b>                       | iOS     | 3.40    | -       | 4.00    | -       | 3.67    | -       | 3.33    | -       | 3.00    | -       | 3.00    | -       | 3.60    | -       |
| <b>eco footprint</b>                      | Android | 2.20    | -       | 3.75    | -       | 2.00    | -       | 2.75    | -       | 2.25    | -       | 1.40    | -       | 2.68    | -       |
| <b>ECO LIFE HACKS</b>                     | Android | 2.00    | -       | 3.75    | -       | 3.00    | -       | 2.80    | -       | 2.00    | -       | 2.00    | -       | 2.89    | -       |
| <b>ecological footprint</b>               | Android | 1.40    | -       | 4.25    | -       | 3.00    | -       | 2.80    | -       | 1.75    | -       | 1.00    | -       | 2.86    | -       |
| <b>Food Miles Footprint</b>               | Android | 2.80    | 2.20    | 3.00    | 3.80    | 3.33    | 4.00    | 3.20    | 2.40    | 2.25    | 2.50    | 2.20    | 2.00    | 3.08    | 3.10    |
| <b>Green Plaza</b>                        | iOS     | 2.20    | 2.00    | 4.25    | 3.80    | 2.67    | 2.70    | 2.40    | 2.30    | 2.00    | 1.80    | 1.80    | 2.00    | 2.88    | 2.70    |
| <b>GreenYou</b>                           | iOS     | 1.80    | 1.60    | 4.00    | 3.80    | 2.33    | 2.00    | 2.67    | 2.30    | 1.75    | 1.50    | 1.60    | 1.00    | 2.70    | 2.40    |
| <b>Lotus Greens Carbon Calculator</b>     | Android | 2.60    | 1.80    | 3.75    | 3.50    | 3.00    | 3.00    | 3.00    | 3.00    | 2.25    | 2.00    | 1.60    | 1.20    | 3.09    | 2.80    |
| <b>Math Tappers: Carbon Choices</b>       | iOS     | 2.40    | 1.80    | 3.25    | 4.30    | 3.00    | 2.70    | 3.83    | 3.00    | 3.00    | 2.80    | 3.40    | 3.00    | 3.12    | 3.00    |
| <b>Oroeco</b>                             | iOS     | 3.60    | 3.20    | 3.75    | 4.00    | 4.00    | 4.70    | 4.00    | 3.70    | 3.75    | 3.80    | 3.60    | 3.80    | 3.84    | 3.90    |
| <b>Residential CO<sub>2</sub> Alert</b>   | iOS     | 2.80    | 2.30    | 3.50    | 4.80    | 3.33    | 3.70    | 2.20    | 2.00    | 2.00    | 2.30    | 1.80    | 2.00    | 2.96    | 3.20    |
| <b>SustainableI</b>                       | iOS     | 3.00    | -       | 3.50    | -       | 3.33    | -       | 3.60    | -       | 2.50    | -       | 2.80    | -       | 3.36    | -       |
| <b>VES CO<sub>2</sub> Tool HD</b>         | iOS     | 3.60    | 3.40    | 4.50    | 4.50    | 3.67    | 4.00    | 4.00    | 3.40    | 3.75    | 3.80    | 3.40    | 3.00    | 3.94    | 3.80    |

\*Shaded = good quality, no shading = acceptable quality
